# Supplementary material for: Dietary milk fat globule membrane supplementation during late gestation increased the growth of neonatal piglets by improving their plasma parameters, intestinal barriers, and fecal microbiota
Source: Royal Society of Chemistry journal article supplement (doi:10.1039/d0ra02618b), 2020-01-01
Supplement: d0ra02618b1.pdf [file d0ra02618b1.pdf]

## **Supplementary materials**

Supplementary Table S1: Composition of diets for sows during late gestation and lactation.

Supplementary Table S2. Composition of MFGM.

Supplementary Table S3: Primer sequences used in RT-qPCR.

Supplementary Table S4: The effects of MFGM supplementation during late gestation on milk composition of the sows.

Supplementary Table S5: The effects of MFGM supplementation during late gestation on alpha-diversity of fecal microbiota of the sows and the piglets.

Supplementary Table S1. Composition of diet for sows during late gestation and lactation (Air-dry basis, %).

| Ingredients                       | Late gestation | Lactation |
|-----------------------------------|----------------|-----------|
| Corn                              | 63.17          | 58.81     |
| Soybean meal                      | 16.72          | 26.50     |
| Wheat bran                        | 14.00          | 8.71      |
| Soybean oil                       | 2.50           | 2.50      |
| Calcium hydrophosphate            | 0.81           | 1.45      |
| Limestone                         | 1.17           | 1.05      |
| Salt                              | 0.50           | 0.50      |
| Lysine                            | 0.24           | 0.08      |
| Threonine                         | 0.05           | -         |
| Tryptophan                        | 0.01           | -         |
| Premix*                           | 0.50           | 0.50      |
| Total                             | 100            | 100       |
| Nutrient composition <sup>#</sup> |                |           |
| Dry matter                        | 88.73          | 88.04     |
| Digestive energy (MJ/kg)          | 3269           | 3332      |
| Crude protein                     | 15.12          | 18.11     |
| Calcium                           | 0.68           | 0.80      |
| Total phosphorus                  | 0.58           | 0.68      |

Available phosphorus

0.29

0.34

---

\*Provided the following per kg of complete diet: vitamin A, 12,000 IU; vitamin E, 24 IU; vitamin K3, 2.0 mg; thiamine, 2.0 mg; riboflavin, 6.0 mg; pyridoxine, 4 mg; vitamin B12, 24 ng; niacin, 30 mg; pantothenic acid, 20 mg; folic acid, 3.6 mg; biotin, 0.4 mg; choline chloride, 0.4 mg; iron, 96 mg; copper, 8.0 mg; zinc, 120 mg; manganese, 40 mg; iodine, 0.56 mg; selenium, 0.4 mg.

# Calculated value.

Supplementary Table S2. Composition of MFGM.

| Compositions                 | Value     |
|------------------------------|-----------|
| Protein (%)                  | 70.0      |
| Phospholipid (%)             | 6.0       |
| Fat (%)                      | 15.0      |
| Lactose (%)                  | 3.0 - 6.0 |
| Moisture (%)                 | 4.5       |
| Ash (%)                      | 3.0       |
| Typical amino acid (g/100 g) |           |
| Alanine                      | 2.6       |
| Arginine                     | 2.3       |
| Aspartic acid                | 7.9       |
| Cystine/Cysteine             | 1.7       |
| Glutamic Acid                | 10.6      |
| Glycine                      | 1.9       |
| Histidine                    | 1.7       |
| Hydroxyproline               | <0.1      |
| Isoleucine                   | 3.7       |
| Leucine                      | 6.7       |
| Methionine                   | 6.4       |

|               |     |
|---------------|-----|
| Phenylalanine | 1.1 |
| Proline       | 2.7 |
| Serine        | 3.7 |
| Threonine     | 3.5 |
| Tryptophan    | 4.2 |
| Tyrosine      | 1.2 |
| Valine        | 2.5 |

---

MFGM, Milk fat globule membrane.

Supplementary Table S3. Primer sequences used in RT-qPCR.

| Genes     | Forward (5'→3')          | Reverse (5'→3')         |
|-----------|--------------------------|-------------------------|
| GADPH     | ACCCAGAAGACTGTGGATGG     | AAGCAGGGATGATGTTCTGG    |
| Mucin 1   | GTGCCGACGAAAGAACTG       | TGCCAGGTTTCGAGTAAGAG    |
| Mucin 2   | CTGTGTGGGGCCTGACAA       | AGTGCTTGCAGTCGAACTCA    |
| Mucin 4   | TTCACTCCAACCATCCTTCCA    | CTCGTTCCACTTGTCTGTTC    |
| Mucin 13  | GCTACAGTGGAGTTGGCTGT     | GACGAATGCAATCACCAGGC    |
| Mucin 20  | AGGCAGTTACAACATCCACAGAAG | CTGTAGACCATGGCCGAGAAC   |
| ZO-1      | GCCATCCACTCCTGCCTAT      | CGGGACCTGCTCATAACTTC    |
| Occludin  | CAGCAGCAGTGGTAACTTGG     | CAGCAGCAGTGGTAACTTGG    |
| Claudin-1 | AAGGACAAAACCGTGTGGGA     | CTCTCCCCACATTCGAGATGATT |
| Claudin-2 | GCTGGCGAACGAGTTCTTAC     | AGATGGCGCTAGATGTCACC    |
| Claudin-3 | GCCAAAGCCAAGATCCTCTA     | GTAGTCCTTGCGGTCGTAGG    |

|               |                                   |                              |
|---------------|-----------------------------------|------------------------------|
| Claudin-4     | TCAGCCCTGACTTTGCGTG               | ACCTGTCTGTCCACACCAC          |
| TNF- $\alpha$ | TGGGAGTAGACAAGGTACAACCC           | CATCTTCTCAA AATTCGAGTGACAA   |
| INF- $\gamma$ | GCGGCTGACTGAACTCAGATTGTAG         | AGTGCTGTCTGGCCTGCTGTTA       |
| IL-1 $\beta$  | CTCGCAGCAGCACATCAACAAG            | GGAAGGTCCACGGGAAAGACAC       |
| IL-6          | ACCACGGCCTTCCCTACTT               | CACAACTCTTTTCTCATTTCAC       |
| IL-8          | CCTCATTCCCTGTGCTGGTCA             | TGCAAGTTGAGGCAAGAAGAC        |
| IL-10         | TCTGAGAACAGCTGCATCCAC             | CGCCCATCTGGTCCTTCGTT         |
| IL-22         | CCCAGATCTGGGTACCATGGTCCCG         | GCCTTTAATACGACATTGGGACAGT    |
| TLR-2         | AAGATGTCGTTCAAGGAGGTGCG           | ATCCTCTGAGATTTGACGCTTTG      |
| TLR-4         | GGTGTGAAATTGAGACAATTGAAAAC        | GTTTCCTGTCAGTACCAAGGTTGA     |
| GPR41         | TCTTCACCACCGTCTATCTCAC            | CACAAGTCCTGCCACCCTC          |
| GPR43         | CTGCCTGGGATCGTCTGTG               | CATACCCTCGGCCTTCTGG          |
| GPR119        | TATAGGCAGAAGGAGGTA                | AGAGAAGGAGGAGGAATG           |
| GPR120        | GAATTCGCCACCATGGGAATGTCCCTTGAGTGC | TCTAGACTAGCTGGAAATAACAGACAGA |

---

GADPH, glyceraldehyde-3-phosphate dehydrogenase; GPR, G protein-coupled receptor.



Supplementary Table S4. The effects of MFGM supplementation during late gestation on milk composition of the sows.

| Items (%)             | CON          | MFGM         | <i>P</i> value |
|-----------------------|--------------|--------------|----------------|
| Colostrum (%)         |              |              |                |
| Cream                 | 2.88 ± 0.30  | 3.19 ± 0.31  | 0.491          |
| Lactoprotein          | 10.23 ± 0.81 | 10.61 ± 0.73 | 0.734          |
| Lactose               | 1.34 ± 0.13  | 1.43 ± 0.15  | 0.648          |
| Mature milk (d 7) (%) |              |              |                |
| Cream                 | 5.65 ± 0.31  | 5.86 ± 0.23  | 0.589          |
| Lactoprotein          | 5.00 ± 0.04  | 4.89 ± 0.08  | 0.221          |
| Lactose               | 6.19 ± 0.09  | 6.00 ± 0.10  | 0.161          |

MFGM, Milk fat globule membrane; CON, CON group fed basal diet; MFGM, MFGM group fed basal diet plus MFGM.

Supplementary Table S5. The effects of MFGM supplementation during late gestation on alpha-diversity of fecal microbiota of the sows and the piglets.

| Items         | CON             | MFGM            | <i>P</i> value |
|---------------|-----------------|-----------------|----------------|
| Sows          |                 |                 |                |
| Sobs          | 1125.20 ± 24.08 | 1133.00 ± 42.87 | 0.732          |
| Ace           | 1259.90 ± 35.37 | 1259.90 ± 39.01 | 0.998          |
| Shannon       | 4.98 ± 0.09     | 4.91 ± 0.24     | 0.527          |
| Simpson       | 0.019 ± 0.003   | 0.02 ± 0.01     | 0.256          |
| Chao          | 1281.40 ± 48.75 | 1277.2 ± 45.67  | 0.891          |
| Piglets (d 7) |                 |                 |                |
| Sobs          | 754.80 ± 98.81  | 484.00 ± 34.63  | <0.001         |
| Ace           | 827.27 ± 108.11 | 599.22 ± 39.93  | <0.001         |
| Shannon       | 3.63 ± 0.54     | 3.48 ± 0.40     | 0.230          |
| Simpson       | 0.12 ± 0.09     | 0.07 ± 0.03     | 0.453          |

|                |                |                |        |
|----------------|----------------|----------------|--------|
| Chao           | 877.59 ± 109.3 | 387.4 ± 30.19  | <0.001 |
| Piglets (d 21) |                |                |        |
| Sobs           | 416.60 ± 29.90 | 498.40 ± 41.82 | 0.007  |
| Ace            | 549.40 ± 64.64 | 641.21 ± 29.91 | 0.020  |
| Shannon        | 3.46 ± 0.33    | 4.10 ± 0.23    | 0.007  |
| Simpson        | 0.09 ± 0.03    | 0.04 ± 0.01    | 0.009  |
| Chao           | 533.98 ± 47.71 | 642.56 ± 32.30 | 0.003  |

---

MFGM, Milk fat globule membrane; CON, CON group fed basal diet; MFGM, MFGM group fed basal diet plus MFGM.
